# Supplementary material
Source: publisher figshare collection journal article supplement (https://frontiersin.figshare.com/ndownloader/files/21845193)
Supplement: Supplementary file [file 21845193]

## *Supplementary Material*

**Table S1**

Development of sensitivities of LC-MS/MS equipment from the same manufacturer over the time: signal intensity for 1 pg reserpine and respective limit of detection assuming a minimum signal of 3000 arbitrary units for unequivocal detection in LC-QQQ (Rychlik et al., 2018)

| Instrument/type       | Year of release | Signal intensity<br>(arbitrary units) | Mol reserpine<br>detected |
|-----------------------|-----------------|---------------------------------------|---------------------------|
| LCMS 8030/LC-<br>QQQ  | 2010            | 3000                                  | $1.65 \cdot 10^{-15}$     |
| LCMS 8040/LC-<br>QQQ  | 2012            | 30,000                                | $1.65 \cdot 10^{-16}$     |
| LCMS 8050/LC-<br>QQQ  | 2013            | 250,000                               | $1.98 \cdot 10^{-17}$     |
| LCMS 8060/LC-<br>QQQ  | 2015            | 750,000                               | $6.6 \cdot 10^{-18}$      |
| LCMS 9030/LC-<br>QToF | 2018            |                                       | $5.467 \cdot 10^{-18}$    |

LC-QQQ, LC-triple quadrupole MS, LC-QToF, LC-hybrid quadrupole / time of flight
